## 1 Characterization of Neonatal Abstinence Syndrome in Arizona from 2010-2017

2 **Authors: Emery R Eaves,<sup>1,2,3</sup> Jarrett Barber,<sup>3,4</sup> Ryann Whealy,<sup>4,5</sup> Sara A Clancey,<sup>6</sup> Rita Wright,<sup>7</sup>**  
3 **Jill Hager Cocking,<sup>4,5</sup> Joseph Spadafino,<sup>8</sup> and Crystal Marie Hepp<sup>3,4,5\*</sup>**

4 \*Email: [crystal.hepp@nau.edu](mailto:crystal.hepp@nau.edu)

5 Author Affiliations: <sup>1</sup>Northern Arizona University Department of Anthropology; <sup>2</sup>Northern Arizona University  
6 Center for Health Equity Research; <sup>3</sup>Northern Arizona University Southwest Health Equity Research Collaborative;  
7 <sup>4</sup>Northern Arizona University School of Informatics, Computing, and Cyber Systems; <sup>5</sup>Northern Arizona University  
8 Pathogen and Microbiome Institute; <sup>6</sup>Northern Arizona University Institute for Human Development; <sup>7</sup>Northern  
9 Arizona University Department of Social Work; <sup>8</sup>Arizona Department of Health Services

### 10 11 **ABSTRACT:**

12 This study aimed to characterize the population of newborn infants with neonatal abstinence syndrome  
13 (NAS) and mothers who were opioid dependent at the time of giving birth, in Arizona. We analyzed  
14 approximately 1.2 million electronic medical records from the Arizona Department of Health Services  
15 Hospital Discharge Database to identify patterns and disparities across socioeconomic, ethnic/racial,  
16 and/or geographic groupings. In addition, we identified comorbid conditions that are differentially  
17 associated with NAS in infants or opioid dependence in mothers. Our analysis was designed to assess  
18 whether indicators such as race/ethnicity, insurance payer, marital status, and comorbidities are related to  
19 the use of opioids while pregnant.

20 In this paper, we describe a population of mothers who are opioid dependent at the time of giving birth  
21 and infants who experience withdrawal due to opioid exposure in utero. While there have been studies of  
22 national trends in this population (see Patrick et al.), regional trends and issues are less well understood.  
23 Using data from the Arizona Department of Health Services Hospital Discharge Database, we find that  
24 women and infants who are non-Hispanic White and economically disadvantaged, tend to be part of our  
25 populations of interest more frequently than expected. Additionally, we find that women who are opioid  
26 dependent at the time of giving birth are unmarried more often than expected, and we suggest that marital  
27 status could be a proxy for support. Finally, we report comorbidities, some of which have not been  
28 previously reported, associated with infants who have NAS and mothers who are opioid dependent.

### 29 **Introduction:**

30 Neonatal Abstinence Syndrome (NAS), also called Neonatal Opioid Withdrawal Syndrome (NOWS), is a  
31 consequence of abrupt withdrawal from intrauterine opioid exposure after birth [1-3]. Clinical abstinence  
32 symptoms are observed in 60-80% of substance exposed neonates, and include neurological,  
33 gastrointestinal, and autonomic complications [1]. Neonates with NAS are commonly treated with  
34 morphine and methadone to ease withdrawal symptoms, and occasionally with the addition of  
35 phenobarbital and clonidine as adjunctive agents [1, 4, 5]. Chronic opioid exposure in utero occurs in  
36 three different contexts: (1) active, untreated addiction to opioids (heroin or prescription opioids); (2)  
37 opioids used for chronic pain management; and (3) Medication Assisted Treatment (MAT) such as  
38 methadone or buprenorphine during pregnancy [6]. Symptoms commonly used to identify NAS cases  
39 include tremors, seizures, convulsions, feeding problems, vomiting, diarrhea, respiratory problems, and  
40 other neonatal complications [7]. In this paper, we describe the results of analysis of Arizona Hospital  
41 Discharge records from 2010 to 2017 to characterize the population of infants born with NAS and their  
42 mothers. We found that additional comorbid conditions were more likely to co-occur with NAS than  
43 several of the commonly used diagnostic criteria. Our results suggest a need for better characterization of

44 comorbid conditions in NAS infants and their mothers. Improving understanding in these areas has  
45 implications for identification and secondary prevention of NAS.

46 Current NAS prevention strategies include family planning services, prenatal and preconception medical  
47 care, changes in the prescribing of opioid drugs, and routine substance use screenings [8, 9]. There are  
48 major inconsistencies in substance use screening and NAS treatment [10, 11] and the American Academy  
49 of Pediatrics has called for more similarity and standardization of care for infants with NAS [12].  
50 Standardized screening and treatment also has the potential to improve care for infants with NAS and  
51 their mothers who are opioid dependent at the time of giving birth [10, 13]. Better and more reliable  
52 criteria for screening and early identification of NAS cases is a key gap in efforts to improve and  
53 standardize treatment.

54  
55 Nationwide, NAS cases are more common in rural than in urban areas [14-16]. Between 2004 and 2013,  
56 there was a 7-fold increase in NAS in rural areas alone [17]. In Arizona, where 80% of the population live  
57 in mental health professional shortage areas [18], increasing availability of illicit drugs and steady rates of  
58 prescription opioid pain reliever use impact the population, including pregnant women [19]. NAS  
59 incidence in Arizona was previously reported to be 1.3 per 1,000 births in 1999, and increased to 3.9 per  
60 1,000 births in 2013, a threefold increase [20]. The number of opioid-related deaths in Arizona has  
61 increased 74% from 2012 to 2016, resulting in more than 2 deaths per day in 2016 [21]. Consistent with  
62 findings that socioeconomic status is a factor in NAS cases [22], Hussaini and Saavedra reported that  
63 nearly 80% of NAS cases in Arizona were paid for by Medicaid, especially in the border regions of the  
64 state [19].

65 On June 5, 2017, Arizona Governor Doug Ducey declared a Public Health State of Emergency due to the  
66 opioid epidemic [23]. An *Enhanced Surveillance Advisory* went into effect as a first step toward  
67 understanding the current opioid situation in Arizona and to collect data to develop best practices for  
68 interventions. As part of this advisory, any opioid-related event (opioid-related death, naloxone doses  
69 administered, NAS cases, etc.) must be reported to Arizona Department of Health Services within 24  
70 hours [23]. As such, we hypothesized that the number of reported NAS cases would correspondingly  
71 increase, giving us an opportunity to perform a comprehensive characterization of the population of  
72 infants with NAS and mothers who are opioid dependent. This analysis is the first of its kind in Arizona,  
73 and moves toward a better understanding of the population of Arizona infants born with NAS and their  
74 mothers. The analysis presented below is focused on the 5.5 years prior to and 1.5 years following the  
75 implementation of Arizona's opioid surveillance policy. While there have been studies of national trends  
76 in this population [22], regional trends and issues are less well understood [15, 24]. In this pilot project,  
77 we use data from the Arizona Department of Health Services Hospital Discharge Database to characterize  
78 the population of infants born with NAS and their mothers in Arizona from 2010 to 2017.

## 79 **Methods:**

### 80 Data Request

81 Northern Arizona University (NAU) has a data use agreement with the Arizona Department of Health  
82 Services (ADHS), allowing researchers an expedited path to access records in the ADHS Hospital  
83 Discharge Database and other databases. We submitted a data request to the Human Subjects Research  
84 Board (HSRB) at ADHS, to access electronic medical records for all infants who were born and all  
85 mothers who gave birth in Arizona from 2010-2017. Notably, Indian Health Services hospitals are not  
86 required to report inpatient and emergency department visits to ADHS, so birth events at these hospitals  
87 are not captured. The request was approved as public health surveillance, and we additionally submitted a

88 request for determination of non-human subjects research to the NAU Institutional Review Board. Based  
89 on the ADHS HSRB's determination of public health surveillance, NAU IRB determined the research to  
90 be non-human subjects research. This final dataset, which was transferred between two secure servers at  
91 ADHS and NAU, included the electronic medical records from 643,370 mothers and 663,353 infants. All  
92 variables and descriptions included in the final dataset used in this project are included in Table S1.

### 93 Identifying the Population of Interest

94 The purpose of this study is to characterize the population of newborn infants with NAS and mothers who  
95 are opioid dependent at the time of giving birth. We used insurance codes to identify subpopulations of  
96 interest within the larger mother and infant dataset. The dataset spans 2010-2017, including both the  
97 International Classification of Diseases, Ninth Revision, Clinical Modification (ICD-9-CM, referred to as  
98 ICD9) and the International Classification of Diseases, Tenth Revision, Clinical Modification (ICD-10-  
99 CM, referred to as ICD10), as the change from ICD9 to ICD10 was required by all healthcare facilities in  
100 the United States no later than October 1, 2015. To identify newborn infants with NAS, we used ICD9  
101 and ICD10 codes 779.5 and P96.1, respectively. Similarly, to identify mothers who were opioid  
102 dependent at the time of giving birth, we used ICD9 codes 304.00-304.03 and 304.70-304.73 and ICD10  
103 code F11, including all subcategories.

### 104 Healthcare Utilization

105 To better understand hospital resource utilization and to serve as a proxy for severity of morbidity, we  
106 compared length of stay and total charges of the subpopulations to the total population of Arizona  
107 mothers who have just given birth and newborn infants. The two variables were compared to each other  
108 using linear regression to better understand how well one explains the other, and t-tests were used to  
109 determine if the populations of interest had means that were significantly different.

### 110 Demographic Disparities

111 We conducted chi-square tests to determine if selected subpopulations belonged to specific racial and/or  
112 ethnic groups or used particular insurance payers significantly more often than expected. Similarly, we  
113 used a chi-square test to determine if mothers who were dependent on opioids at the time of giving birth  
114 had certain marital statuses more frequently than expected. Expected proportions were determined from  
115 the entire mother or infant datasets (Table 2).

### 116 Geographic Disparities

117 To identify geographic locations where there were more opioid dependent mothers at the time of giving  
118 birth than expected based on the total number of mothers who gave birth, we conducted a chi-square  
119 analysis. This analysis was completed for all non-tribal primary care areas in Arizona, aggregated from  
120 2010-2017. A primary care area (PCA) is an area in which most residents seek primary health care from  
121 the same place. The Arizona Department of Health Services states that the PCA is meant to represent  
122 residents' "primary care seeking patterns" [25]. In addition, PCAs are aggregated to prevent re-  
123 identification of a patient in Arizona while allowing for resolution of population health issues at a scale  
124 better than that at which the geographically large Arizona counties provide.

### 125 Associated Comorbid Conditions

126 In addition to demographic information, each inpatient and emergency department electronic medical  
127 record includes up to 26 ICD billing codes, including admitting and principal diagnosis codes. In the case  
128 of the selected subpopulations, these codes may include information regarding comorbidities of NAS or

129 opioid dependence. To understand comorbidity association with NAS and opioid dependence, we selected  
130 comorbidities for their importance in classifying NAS and opioid dependence as measured by their  
131 average minimum depth to the maximal sub-tree in classification random forests [26]. For this, we used  
132 the function `var.select`, with options `method='md'` and `conservative='low'`, in the R library package  
133 `randomForestSRC` [27, 28]. Our data present us with an imbalanced classification problem [29], wherein  
134 positive cases of NAS or opioid dependence represent a very small minority of cases, with the majority of  
135 cases being negative. In such situations, overall classification performance---hence comorbidity selection---  
136 is dominated by the majority class, whereas our interest leans, instead, toward correct classification of  
137 the minority class. We use the method of balanced random forests [29], as implemented in the function  
138 `imbalanced.rfsrc` in the R library package `randomForestSRC` [27, 28], to grow balanced classification  
139 random forests for NAS and opioid dependence before computing the importance of comorbidities.

## 140 **Results and Discussion:**

141 NAS is increasing rapidly in Arizona. While opioid overdose in Arizona has been a cause for great  
142 concern, with suspected overdoses ( $n=32,900$ , ~35 per day) and deaths ( $n=3,935$ , ~4 per day) at epidemic  
143 levels from June 15, 2017 through January 16, 2020 [23], the large number of infants with NAS born  
144 during the same period ( $n=1,295$ ) also warrants attention. To address this issue, we characterized the  
145 population of infants with NAS and mothers who were dependent on opioids at the time of giving birth  
146 within the context of the entire population of infants born and mothers who gave birth in Arizona from  
147 2010 through 2017.

### 148 Healthcare Utilization

149 To determine the impact of maternal opioid use during pregnancy on both newborn infant and maternal  
150 morbidity as well as on healthcare utilization we compared hospitalization rates, average length of stay,  
151 and total charges of the entire populations versus the populations of interest. During the period of time  
152 represented in these data, the rate of newborn infants who have NAS has more than doubled from  
153 approximately 34 in 2010 to 88 in 2017, per every 10,000 births. (Fig. 1). Similarly, the rate of mothers  
154 who are opioid dependent at the time of giving birth has increased from 19 to 85 per every 10,000  
155 mothers who have given birth (Fig. 1). While reporting for infants was substantially higher than reporting  
156 for mothers in 2010, hospitalization rates have evened out over time.

157 In Arizona, newborn infants with NAS have an average length of stay (mean: 19.71 days, median: 16  
158 days) approximately six times longer than that of all infants (mean: 3.17 days, median: 2 days) (Table 1).  
159 Similarly, average total charges are also significantly higher for newborn infants who have NAS (mean:  
160 \$84,615, median: \$49,887) in comparison to all infants (mean: \$10,784, median: \$3,223). While infants  
161 with NAS only compose 0.5% of the total infant population, the total charges associated with infants who  
162 have NAS account for 4.5% of all birth related charges (\$323,230,298 of \$7,153,221,072) from 2010  
163 through 2017. Total charges and length of stay were also significantly higher for mothers who were  
164 dependent on opioids at the time of giving birth, however, the differences were modest in comparison to  
165 the infant population.

### 166 Demographic Disparities

167 Previous studies characterizing infants with NAS and mothers who are dependent on opioids at the time  
168 of giving birth in the United States found that these populations were, more often than expected, non-  
169 Hispanic white and insured by Medicaid [30, 31]. We additionally examined these demographics to  
170 determine if the most heavily impacted populations in Arizona followed national trends. In agreement  
171 with previous studies, we found that both infant (Fig. 2) and mother (Fig. 3) populations of interest were,

172 significantly more often than expected, non-Hispanic white, and were Asian or Hispanic/Latino  
173 significantly less often than expected. Our target populations were insured by either Medicaid or  
174 Medicare significantly more often and by private or military (TRICARE) insurance less often than  
175 expected (Figs. 4 and 5).

176 We additionally considered maternal marital status and found that women dependent on opioids at the  
177 time of giving birth were unmarried significantly more often than expected based on the total population  
178 proportions while unmarried women were dependent on opioids significantly less often than expected.  
179 We suppressed data from categories where there were less than 10 mothers (i.e. widowed). Although  
180 additional studies are necessary to better understand the association between marital status and opioid use  
181 disorder, we suspect that marital status is a proxy for social support. Past studies have found that married  
182 individuals are less likely to use illicit drugs [32] and those who participate in substance-abuse treatment  
183 programs are more likely to experience positive outcomes [33-36]. Heinz et al. found that that close  
184 spousal relationships were a good predictor of reduced cocaine and heroin use in individuals during and  
185 after treatment [37]. With the results of these previous studies, our results suggest further investigation  
186 into outcomes associated with marital and perhaps other forms of social support when considering opioid  
187 use disorder in pregnant women and women of childbearing age.

#### 188 Geographic Disparities

189 Arizona is the 6<sup>th</sup> largest state in the US by area, but is composed of only 15 counties, where six are  
190 among the top 20 geographically largest counties in the United States. The result of a large state being  
191 spread into relatively few counties is that distinct human populations are forced into county level  
192 estimates which are unlikely to provide a relevant picture of population health. The ADHS has  
193 approached this issue by aggregating and reporting population health results for many conditions at the  
194 level of PCA. In an effort to identify if and where maternal opioid dependence is clustered, we adopted  
195 the ADHS strategy and compared counts across the 126 PCAs that compose Arizona. Within the entire  
196 maternal dataset, 25,936 records did not include a PCA, including 75 mothers who were dependent on  
197 opioids at the time of giving birth, and these records were not included in the geographic analysis. In  
198 addition, we suppressed statistically significant results for PCAs where there were fewer than 10 mothers  
199 who were dependent on opioids at the time of giving birth as well as those that are primarily composed of  
200 tribal nations. Rather, we have reported those PCAs back to the ADHS for use in their decision processes.  
201 An initial chi-square test revealed that opioid dependence among mothers who had given birth  
202 significantly deviated from the expected distribution across PCAs. Post-hoc comparisons revealed that  
203 there were significantly more mothers who were dependent on opioids residing in the following PCAs  
204 than expected: Casas Adobes, Encanto Village, Flowing Wells, Globe, North Mountain Village, Prescott,  
205 Safford, Kingman, Tucson Central, Tucson East, Tucson Foothills, and Tucson South. The following  
206 PCAs had significantly fewer mothers who were dependent on opioids at the time of giving birth than  
207 expected: Buckeye, Estrella Village and Tolleson, Gilbert Central, Gilbert South, Maryvale Village, and  
208 Yuma. We are planning future studies to investigate which PCA characteristics may contribute to or  
209 mitigate opioid dependence among pregnant women and women of child-bearing age.

#### 210 Associated Comorbid Conditions

211 As mentioned in the Methods section, we used random forests to select comorbidities associated with  
212 NAS and opioid dependence. Presence or absence of an ICD9 or 10 code for NAS or opioid dependence  
213 was used as the labelled target variable. We analyzed four sets of data for identification of comorbid  
214 conditions: Infants with ICD9 codes, Infants with ICD10 codes, Mothers with ICD9 codes, Mothers with  
215 ICD10 codes. For infants with NAS (Table 2), we found that, in agreement with previous studies, feeding

216 problems, respiratory distress (transitory tachypnea), and neonatal jaundice commonly co-occurred with  
217 NAS [38-40]. We also found that neonatal candidiasis infection and diaper or skin rash (diaper dermatitis)  
218 were among top-ranked comorbid conditions. In a recent study of vaginal flora, Farr et al observed  
219 significantly higher rates of candidiasis in pregnant mothers receiving medication assisted opioid  
220 treatment than in control groups [41]. Diaper dermatitis is a known condition common among infants  
221 with NAS, however, it is not considered a reliable diagnostic criterion [42]. Our data suggest that  
222 considerably more attention should be paid to potential links between dermatitis and vaginal candidiasis  
223 with NAS. To our knowledge there are no studies linking increased rates of neonatal candidiasis with  
224 vaginal candidiasis increases among mothers using medication assisted (opioid maintenance) treatment.

225 Like the infant analysis, analysis of mothers' discharge records identified several comorbid conditions  
226 that previous studies have found to be associated with opioid dependence during pregnancy. For example,  
227 polysubstance use, notably tobacco, alcohol, and stimulants, is more common among pregnant women  
228 who use opioids [43]. Tobacco use is particularly prevalent among this population, with estimates of  
229 tobacco use as high as 85-90% among pregnant women treated with buprenorphine or methadone [44-46].  
230 Pregnant women using opioids have been found to be more likely to be diagnosed with depression,  
231 anxiety, post-traumatic stress disorder, and panic disorder [47], which is also in agreement with our study,  
232 where maternal mental disorders are highly ranked. Interestingly, while we found studies that identified  
233 increased opioid prescriptions written to women with perineal lacerations [48], to our knowledge no  
234 studies have reported an association between perineal lacerations and opioid dependence at the time of  
235 giving birth. Epidural anesthesia has been associated with increased perineal laceration [49] and mothers  
236 who are opioid dependent at the time of giving birth are not candidates for pain management with opioids  
237 [50, 51]. Future research should consider whether the risk of perineal laceration among opioid dependent  
238 women is elevated due to pain management practices or other factors.

## 239 DISCUSSION/CONCLUSIONS:

240 Infants with NAS in Arizona and their mothers from 2010-2017 tended to be socioeconomically  
241 disadvantaged, non-Hispanic White, and geographically clustered throughout Arizona. In addition,  
242 mothers in this group are unpartnered more frequently than expected, which may indicate a relative lack  
243 of social support. Unsurprisingly, characteristics of mothers with opioid dependence at the time of birth  
244 were closely related to those of infants with NAS. There does not appear to be an increase in reported of  
245 maternal opioid dependence from 2016 to 2017. Mothers who were opioid dependent accumulated nearly  
246 \$8000 more in total charges and stayed a half day longer than those who were not opioid dependent.  
247 There does not appear to be a significant age difference between mothers with opioid dependence at the  
248 time of birth and those who are not opioid dependent.

249 Hospital charges for infants born with NAS are paid for with Medicaid or Medicare more often than  
250 expected, and less often than expected with private health insurance, military coverage, or self-pay ( $p <$   
251  $0.05$ ). On average, infants born with NAS in Arizona stayed in the hospital 6 times longer and have 8  
252 times higher hospital charges than those without NAS. Despite new state mandates to reduce opioid  
253 deaths through Enhanced Surveillance on June 5<sup>th</sup>, 2017, there does not appear to be a substantial increase  
254 in reporting from 2016 to 2017.

255 Areas with higher than expected rates of NAS in relation to population estimates warrant additional  
256 research. In our meetings with stakeholders and investigation of local understandings of areas with higher  
257 rates of drug use in the state, observations were consistent with our findings. For example, the Prescott  
258 area is known for a proliferation of "sober living houses" in recent years, with so many recovering  
259 substance users coming to the area from outside that the trend has been reported in state and national

260 news outlets [52, 53]. Low numbers of medication assisted treatment providers in areas with the highest  
 261 rates of opioid use and NAS cases are also potentially responsible for higher than expected rates in some,  
 262 particularly rural, areas of the state [54].

263 The comorbidity analysis, using supervised machine learning, revealed that diaper dermatitis and jaundice  
 264 were more importantly associated with NAS than traditional conditions of respiratory distress and  
 265 irritability. Additionally, to our knowledge, neonatal candidiasis has not been previously associated with  
 266 NAS. However, our results, coupled with the finding that pregnant women receiving medication assisted  
 267 opioid treatment are more frequently colonized with *Candida* [41], suggests that it may be important to  
 268 screen pregnant women receiving medication assisted opioid treatment for candidiasis to develop  
 269 maternal and neonatal treatment strategies. Our analysis of the Arizona Hospital Discharge Database from  
 270 2010 to 2017 suggests a need for better characterization of comorbid conditions in NAS infants and their  
 271 mothers. Calls to improve standardization in the treatment of NAS infants, and efforts to improve primary  
 272 and secondary prevention of NAS may benefit from improved understanding of comorbid and frequently  
 273 co-occurring conditions. Future research should also consider potential interactions between opioid  
 274 exposure and comorbid conditions in utero.

275 **ACKNOWLEDGEMENTS:**

276 This work was supported by a Pilot grant project to Dr. Crystal Hepp as part of the NIH/NIMHD RCMI  
 277 U54MD012388 to Julie Baldwin and Diane Stearns. The authors acknowledge the contributions of  
 278 Arizona Department of Health Services staff members Kyle Gardner and Timothy Flood for assistance  
 279 defining the data request, the Northern Arizona University Information Technology Services for  
 280 managing data security issues, and the Southwestern Health Equity Research Collaborative Research  
 281 Infrastructure Core for analytical assistance.

282

| POPULATION                   | LENGTH OF STAY (DAYS) |        |          | TOTAL CHARGES (\$) |        |          |
|------------------------------|-----------------------|--------|----------|--------------------|--------|----------|
|                              | Mean                  | Median | p-value  | Mean               | Median | p-value  |
| INFANTS WITHOUT NAS          | 3.07                  | 2      |          | 10356              | 3209   |          |
| INFANTS WITH NAS             | 19.71                 | 16     | P<0.0001 | 84615              | 49887  | P<0.0001 |
| NON-OPIOID DEPENDENT MOTHERS | 2.44                  | 2      |          | 16801              | 14174  |          |
| OPIOID DEPENDENT MOTHERS     | 3.22                  | 3      | P<0.0001 | 23674              | 18406  | P<0.0001 |

283 *Table 1. Comparison of hospital utilization variables in the target versus non-target populations and results of the t-test analyses.*

| Rank | ICD9 Code       | ICD10 Code (and Rank) | Description                                                                                                 |
|------|-----------------|-----------------------|-------------------------------------------------------------------------------------------------------------|
| 1    | 779.5           | P961 (1)              | Drug withdrawal syndrome in newborn                                                                         |
| 2    | 779.31          | P92.1-2 and 8-9 (4)   | Feeding problems in newborn                                                                                 |
| 3    | 760.72          | P04.49 (2)            | Hallucinogenic agents affecting fetus or newborn via placenta or breast milk                                |
| 4    | 7746            | P599 (5)              | Unspecified fetal and neonatal jaundice                                                                     |
| 5    | 6910            | L22 (3)               | Diaper or napkin rash                                                                                       |
| 6    | 770.6           | P22.1 (6)             | Transitory tachypnea of newborn                                                                             |
| 7    | 760.79          | P04.9 (9)             | Other noxious influences affecting fetus or newborn via placenta or breast milk                             |
| 8    | 771.7           | P37.5 (7)             | Neonatal Candida infection                                                                                  |
| 9    | V290            | P002 (13)             | Observation for suspected infectious condition                                                              |
| 10   | V05.3           | Z23 (19)              | Need for prophylactic vaccination and inoculation against viral hepatitis                                   |
| 11   | V30.00          | Z38.00 (8)            | Single liveborn, born in hospital, delivered without mention of cesarean section (i.e. delivered vaginally) |
| 16   | 745.4 and 745.6 | Q21.1 (10)            | Atrial septal defect                                                                                        |

*Table 2. Top ranked ICD9 and ICD10 codes associated with infants who have NAS. ICD10 codes were used for ranking infants admitted after Oct. 1 2015, as well as for any infants born in health care facilities that adopted ICD10 codes prior to Oct. 1, 2015. Conditions are in the ICD9 rank order (see first column), and the corresponding ICD10 and rank of the ICD10 code are listed. The increase from rank 11 to rank 16 was allowed so that all top 10 ICD10 codes could be shown.*



| Rank | ICD9 Code | ICD10 Code (and Rank)            | Description                                                                                                                            |
|------|-----------|----------------------------------|----------------------------------------------------------------------------------------------------------------------------------------|
| 1    | 304       | F11.20, F11.90, F1110 (1,3,4)    | Opioid type dependence, unspecified                                                                                                    |
| 2    | 648.31    | O99.324 (2)                      | Drug dependence of mother, delivered, with or without mention of antepartum condition                                                  |
| 3    | 648.41    | O99.344 (8)                      | Mental disorders of mother, delivered, with or without mention of antepartum condition                                                 |
| 4    | 649.01    | O99.334 and F17.210 (5,6)        | Tobacco use disorder complicating pregnancy, childbirth, or the puerperium, delivered, with or without mention of antepartum condition |
| 5    | 338.29    | G89.29 (9)                       | Other chronic pain                                                                                                                     |
| 6    | V23.7     | O09.30 (7)                       | Supervision of high-risk pregnancy with insufficient prenatal care                                                                     |
| 7    | 644.21    | O60.14X0 (57)                    | Early onset of delivery, delivered, with or without mention of antepartum condition                                                    |
| 8    | 648.91    | No specific conversion           | Other current conditions classifiable elsewhere of mother, delivered, with or without mention of antepartum condition                  |
| 9    | 647.61    | O98.42, 098.511-513, O98.52 (31) | Other viral diseases in the mother, delivered, with or without mention of antepartum condition                                         |
| 10   | 300       | F41.9 (15)                       | Anxiety state, unspecified                                                                                                             |
| 11   | 664.11    | O70.1 (14)                       | Second-degree perineal laceration, delivered, with or without mention of antepartum condition                                          |
| 12   | 656.51    | O36.5110-130, O36.5910-30 (26)   | Poor fetal growth, affecting management of mother, delivered, with or without mention of antepartum condition                          |
| 62   | 305.70-72 | F15.10 (10)                      | Amphetamine or related acting sympathomimetic abuse (unspecified, continuous, or episodic)                                             |

*Table 3. Top ranked ICD9 and ICD10 codes associated with mothers who are opioid dependent at the time of giving birth. ICD10 codes were used for ranking mothers admitted after Oct. 1 2015, as well as for any infants born in health care facilities that adopted ICD10 codes prior to Oct. 1, 2015. Conditions are in the ICD9 rank order (see first column), and the corresponding ICD10 and rank of the ICD10 code are listed. The increase from rank 12 to rank 62 was allowed so that the top 10 ICD10 codes could be shown.*

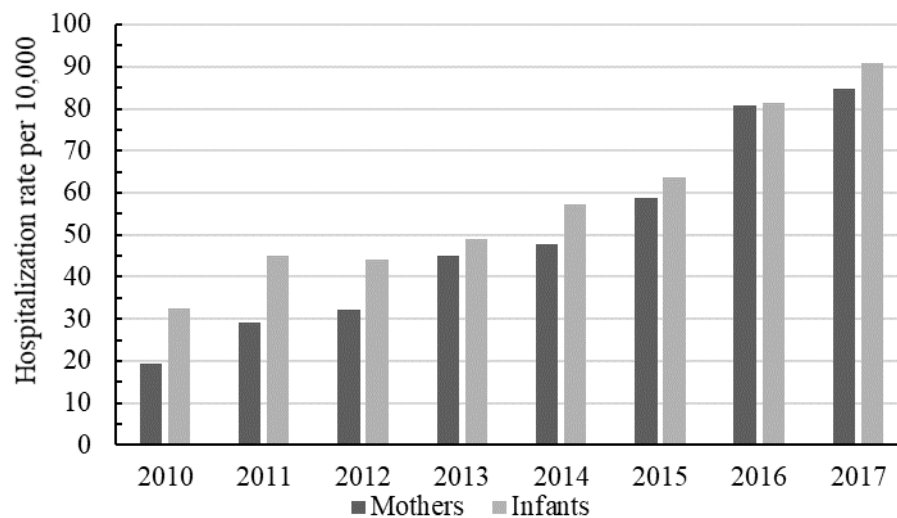

*Figure 1. Hospitalization rates, per 10,000 births, in Arizona for mothers who are dependent on opioids at the time of giving birth (dark grey) and newborn infants with NAS (light grey) from 2010 to 2017.*

286

287

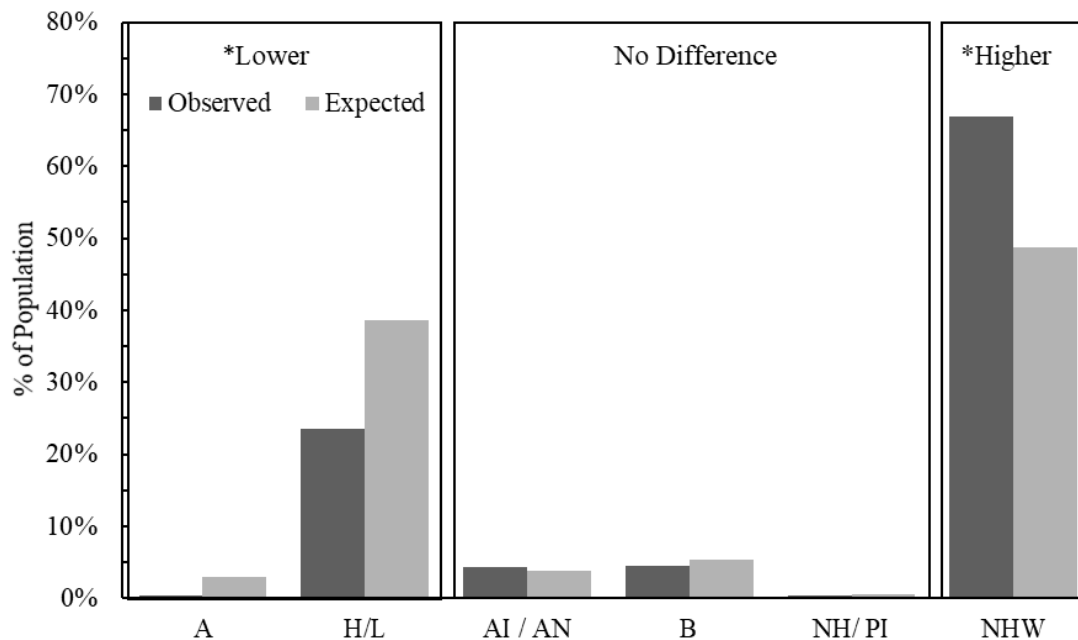

Figure 2. Comparison of the observed versus expected proportions of NAS in each racial/ethnic group of infants. Boxes labelled higher or lower indicate that observed proportions are significantly higher or lower than expected proportions based on a chi-square analysis after post-hoc comparisons that incorporate a Bonferroni correction with six groups ( $p < 0.001/6$ ). A: Asian, H/L: Hispanic or Latino, AI/AN: American Indian or Alaskan Native, B: Black, NH/PI: Native Hawaiian or Pacific Islander, NHW: Non-Hispanic White.

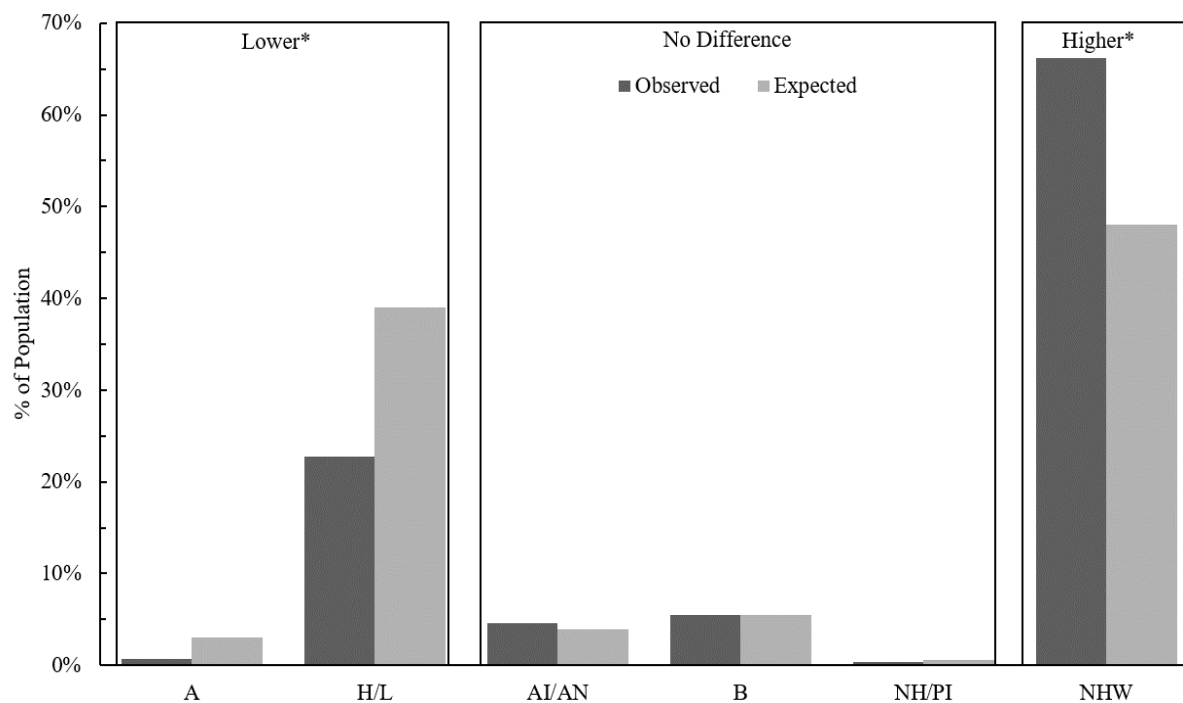

Figure 3. Comparison of the observed versus expected proportions of opioid dependence at the time of giving birth in each racial/ethnic group of mothers. Boxes labelled higher or lower mean that the observed proportions are significantly higher or lower than the expected proportion after post-hoc comparisons that incorporate a Bonferroni correction with six groups ( $p < 0.001/6$ ). A: Asian, H/L: Hispanic or Latino, AI/AN: American Indian or Alaskan Native, B: Black, NH/PI: Native Hawaiian or Pacific Islander, NHW: Non-Hispanic White.

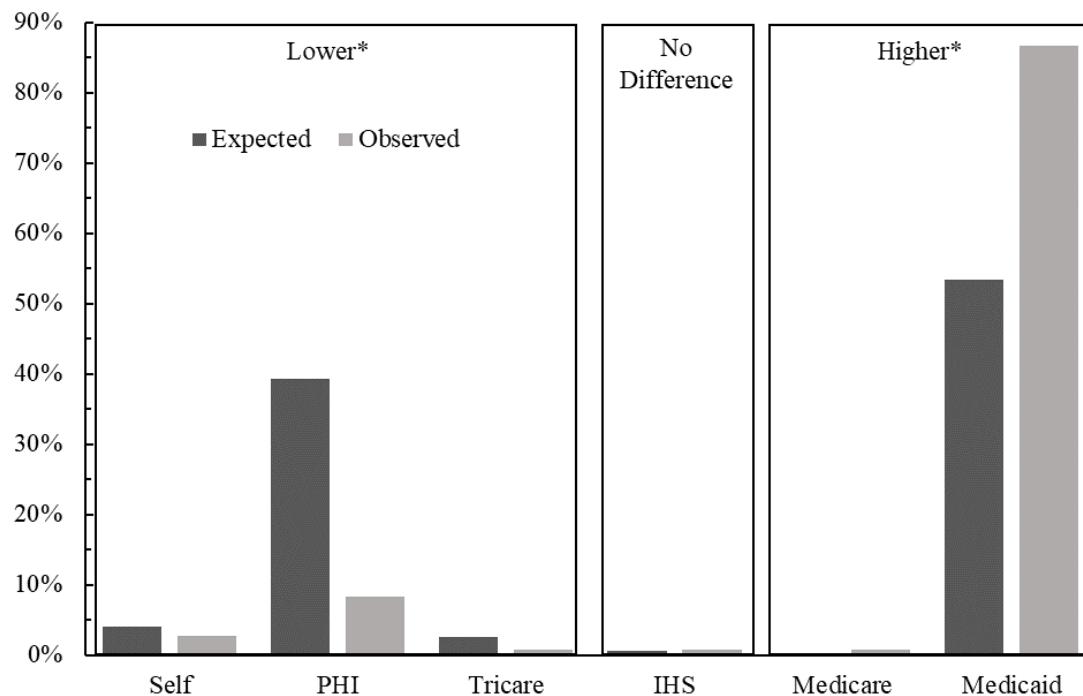

Figure 4. Comparison of the observed versus expected proportions of NAS at the time birth in each payor group utilized for infants. Boxes labelled higher or lower mean that the observed proportions are significantly higher or lower than the expected proportion after post-hoc comparisons that incorporate a Bonferroni correction with six groups ( $p < 0.001/6$ ). PHI: Private Health Insurance, Self: Self Pay, IHS: Indian Health Services.

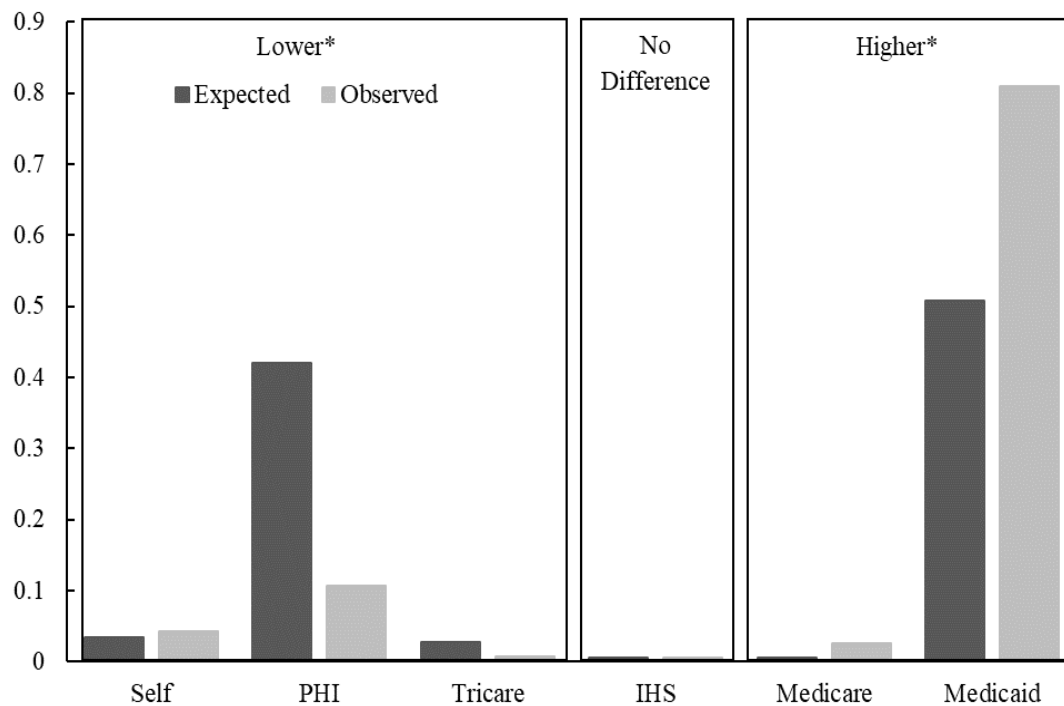

Figure 5. Comparison of the observed versus expected proportions of opioid dependence at the time of giving birth in each payor group utilized for mothers. Boxes labelled higher or lower mean that the observed proportions are significantly higher or lower than the expected proportion after post-hoc comparisons that incorporate a Bonferroni correction with six groups ( $p < 0.001/6$ ). PHI: Private

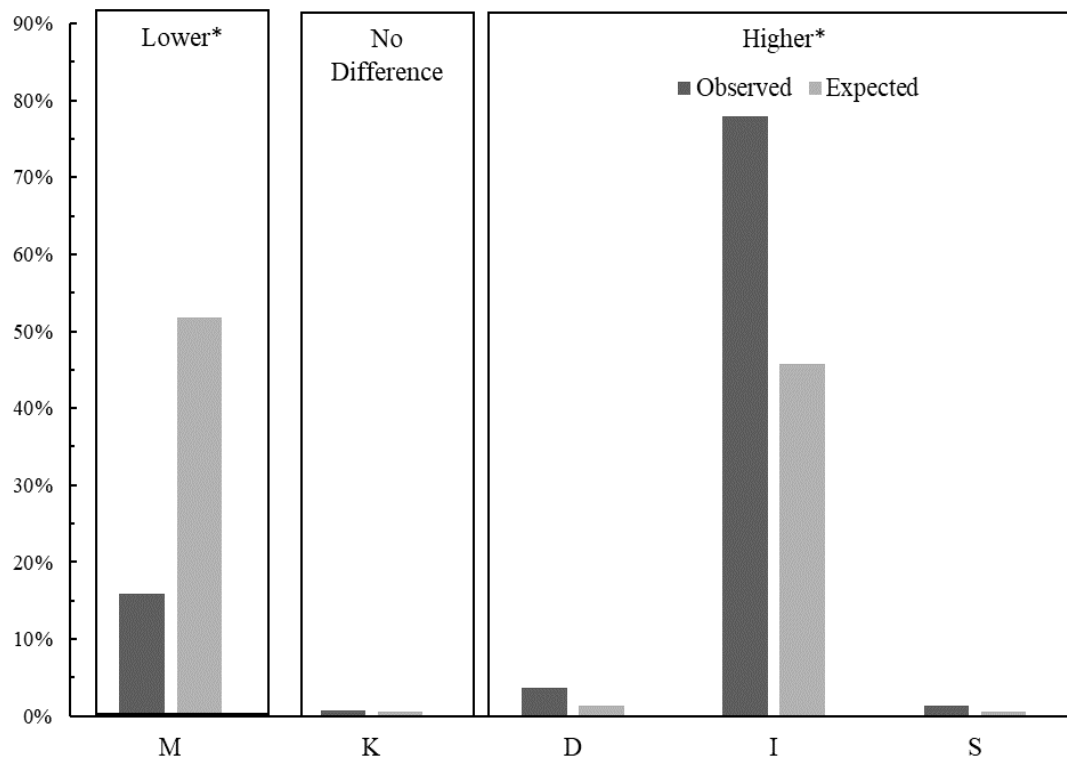

Figure 6. Comparison of the observed versus expected proportions of opioid dependence at the time of giving birth in by maternal marital status. Boxes labelled higher or lower mean that the observed proportions are significantly higher or lower than the expected proportion after post-hoc comparisons that incorporate a Bonferroni correction with six groups ( $p < 0.001/5$ ). M: Married, K: Unknown, D: Divorced, I: Single, S: Separated.

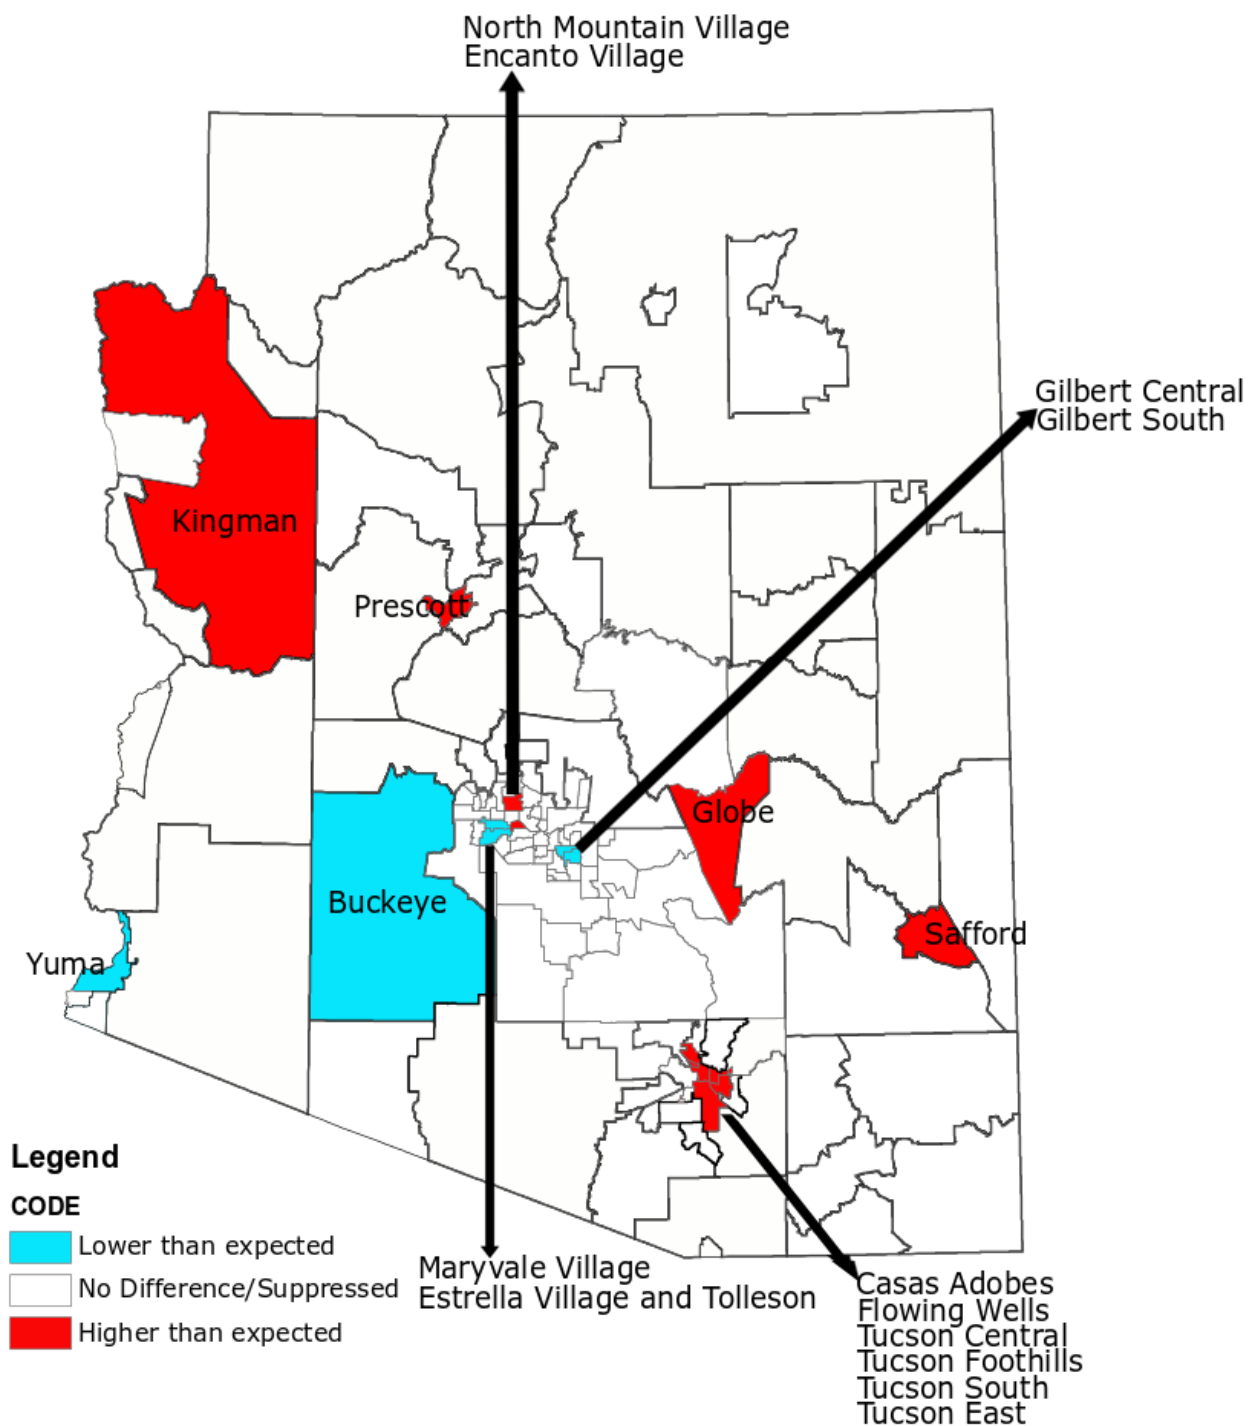

Figure 7. Comparison of the observed versus expected proportions of opioid dependence at the time of giving birth by maternal residential PCA. Red or blue indicates that there is a significantly higher or lower number of mothers using opioids than expected. A map with all PCAs labelled can be found on the ADHS website: <https://www.azdhs.gov/documents/prevention/health-systems-development/data-reports-maps/maps/azpca.pdf>



|                              |                                  | Mothers <sup>O</sup> | Mothers |  | Infants <sup>NAS</sup> | Infants |
|------------------------------|----------------------------------|----------------------|---------|--|------------------------|---------|
| Year (Fig. 1)                | 2010                             | 159                  | 82143   |  | 288                    | 84772   |
|                              | 2011                             | 235                  | 80350   |  | 370                    | 82598   |
|                              | 2012                             | 263                  | 81647   |  | 367                    | 83594   |
|                              | 2013                             | 366                  | 81089   |  | 416                    | 83032   |
|                              | 2014                             | 394                  | 82382   |  | 486                    | 84283   |
|                              | 2015                             | 474                  | 80785   |  | 542                    | 82550   |
|                              | 2016                             | 649                  | 80404   |  | 666                    | 81827   |
|                              | 2017                             | 633                  | 74570   |  | 675                    | 76136   |
|                              | Total                            | 3173                 | 643370  |  | 3810                   | 658792  |
| Race/Ethnicity (Figs. 2 & 3) | Asian                            | 21                   | 19180   |  | 13                     | 19076   |
|                              | Hispanic/Latino                  | 717                  | 247391  |  | 889                    | 253466  |
|                              | American Indian or Alaska Native | 144                  | 24556   |  | 165                    | 24241   |
|                              | Black                            | 172                  | 34460   |  | 170                    | 34890   |
|                              | Native Hawaiian/Pacific Islander | 11                   | 3634    |  | 12                     | 3621    |
|                              | Non-Hispanic White               | 2080                 | 304745  |  | 2509                   | 316390  |
|                              | Total                            | 3145                 | 633966  |  | 3758                   | 651684  |
| Insurance (Figs. 4 & 5)      | Self                             | 135                  | 21350   |  | 105                    | 26093   |
|                              | Private                          | 335                  | 264803  |  | 315                    | 254420  |
|                              | Tricare                          | 23                   | 17032   |  | 30                     | 17129   |
|                              | IHS                              | 19                   | 3645    |  | 27                     | 3713    |
|                              | Medicare                         | 81                   | 3335    |  | 27                     | 1261    |
|                              | Medicaid                         | 2528                 | 318979  |  | 3244                   | 345333  |
|                              | Total                            | 3121                 | 629144  |  | 3748                   | 647949  |
| Marital Status (Fig. 6)      | Married                          | 506                  | 333116  |  |                        |         |
|                              | Unknown                          | 25                   | 4075    |  |                        |         |
|                              | Divorced                         | 115                  | 8665    |  |                        |         |
|                              | Single                           | 2474                 | 293773  |  |                        |         |
|                              | Separated                        | 44                   | 3207    |  |                        |         |
|                              | Total                            | 3164                 | 642836  |  |                        |         |

Table S1. Summary of non-geographic data used in this study by figure. The Mothers<sup>O</sup> column contains data for all mothers who were dependent on opioids at the time of giving birth. The Infants<sup>NAS</sup> column contains data for all infants who had NAS. Totals at the end of each category are not the same for all categories due to missing data or because some patients reported atypical categories (e.g. payer was workers compensation or individual was a foreign national).

294

295

296

297

298

299 References Cited:

- 300 1. Gomez-Pomar E, Finnegan LP. The Epidemic of Neonatal Abstinence Syndrome, Historical  
301 References of Its' Origins, Assessment, and Management. *Frontiers in Pediatrics*. 2018;6:33.  
302 DOI: <https://doi.org/10.3389/fped.2018.00033>
- 303 2. Kocherlakota P. Chapter 19 - Pharmacologic Therapy for Neonatal Abstinence Syndrome. In:  
304 Benitz WE, Smith PB, editors. *Infectious Disease and Pharmacology*. Philadelphia: Content  
305 Repository Only!; 2019. p. 243-59.
- 306 3. Coyle MG, Brogly SB, Ahmed MS, Patrick SW, Jones HE. Neonatal abstinence syndrome.  
307 *Nature Reviews Disease Primers*. 2018;4(1):47. DOI: <https://doi.org/10.1038/s41572-018-0045-0>
- 308 4. Wachman EM, Werler MM. Pharmacologic Treatment for Neonatal Abstinence Syndrome:  
309 Which Medication Is Best? *JAMA pediatrics*. 2019;173(3):221-3.  
310 DOI:10.1001/jamapediatrics.2018.5029
- 311 5. Wood T, Bordelon C, Fogger S. Shining a Light: Integrating Protocols Into Clinical Practice for  
312 Treatment of Neonatal Abstinence Syndrome. *Journal of Addictions Nursing*. 2019;30(1):61-6.  
313 DOI: 10.1097/JAN.0000000000000267
- 314 6. McCarthy JJ, Leamon MH, Finnegan LP, Fassbender C. Opioid dependence and pregnancy:  
315 minimizing stress on the fetal brain. *American Journal of Obstetrics and Gynecology*.  
316 2017;216(3):226-31. doi: <https://doi.org/10.1016/j.ajog.2016.10.003>
- 317 7. Bersani I, Corsello M, Mastandrea M, Patacchiola V, Foligno S, Garofalo V, et al. Neonatal  
318 abstinence syndrome. *Early Human Development*. 2013;89:S85-S7. doi:  
319 [https://doi.org/10.1016/S0378-3782\(13\)70112-9](https://doi.org/10.1016/S0378-3782(13)70112-9)
- 320 8. Reddy UM, Davis JM, Ren Z, Greene MF. Opioid Use in Pregnancy, Neonatal Abstinence  
321 Syndrome, and Childhood Outcomes: Executive Summary of a Joint Workshop by the Eunice  
322 Kennedy Shriver National Institute of Child Health and Human Development, American  
323 Congress of Obstetricians and Gynecologists, American Academy of Pediatrics, Society for  
324 Maternal-Fetal Medicine, Centers for Disease Control and Prevention, and the March of Dimes  
325 Foundation. *Obstetrics and gynecology*. 2017;130(1):10. DOI: 10.1097/AOG.0000000000002054
- 326 9. Ko JY, Wolicki S, Barfield WD, Patrick SW, Broussard CS, Yonkers KA, et al. CDC grand  
327 rounds: public health strategies to prevent neonatal abstinence syndrome. *MMWR Morbidity and*  
328 *mortality weekly report*. 2017;66(9):242. DOI: <http://dx.doi.org/10.15585/mmwr.mm6609a2>
- 329 10. Bagley SM, Wachman EM, Holland E, Brogly SB. Review of the assessment and management of  
330 neonatal abstinence syndrome. *Addiction science & clinical practice*. 2014;9(1):19. DOI:  
331 10.1186/1940-0640-9-19
- 332 11. Kelly LE, Jansson LM, Moulds W, Pereira J, Simpson S, Guttman A, et al. A core outcome set  
333 for neonatal abstinence syndrome: study protocol for a systematic review, parent interviews and a  
334 Delphi survey. *Trials*. 2016;17(1):536. DOI: 10.1186/s13063-016-1666-9
- 335 12. Patrick SW, Schumacher RE, Horbar JD, Buus-Frank ME, Edwards EM, Morrow KA, et al.  
336 Improving care for neonatal abstinence syndrome. *Pediatrics*. 2016;137(5):e20153835. DOI:  
337 10.1542/peds.2015-3835

- 338 13. Burnette T, Chernicky L, Towers CV. The effect of standardizing treatment when managing  
339 neonatal abstinence syndrome. *J Matern Fetal Neonatal Med.* 2019 Oct;32(20):3415-3419. DOI:  
340 10.1080/14767058.2018.1465038
- 341 14. Brown J, Nolte J. Expanded buprenorphine prescribing privileges: Sandbagging in the midst of  
342 the flood? *Res Social Adm Pharm.* 2018 Jun;14(6):617-618. DOI:  
343 10.1016/j.sapharm.2018.03.001
- 344 15. Brown JD, Goodin AJ, Talbert JC. Rural and Appalachian disparities in neonatal abstinence  
345 syndrome incidence and access to opioid abuse treatment. *The Journal of rural health.*  
346 2018;34(1):6-13. DOI: 10.1111/jrh.12251
- 347 16. Admon LK, Bart G, Kozhimannil KB, Richardson CR, Dalton VK, Winkelman TN.  
348 Amphetamine-and Opioid-Affected Births: Incidence, Outcomes, and Costs, United States, 2004–  
349 2015. *Am J Public Health.* 2018 Nov 29:e1-e7. DOI: 10.2105/AJPH.2018.304771
- 350 17. Sanlorenzo LA, Stark AR, Patrick SW. Neonatal abstinence syndrome: an update. *Current*  
351 *opinion in pediatrics.* 2018;30(2):182. DOI: 10.1097/MOP.0000000000000589
- 352 18. Koppell J, Daugherty DB, Garcia J, Whitsett A. Arizona’s Vulnerable Population. A report  
353 prepared by Arizona State University. 2014.  
354 <https://aztownhall.org/Resources/Documents/AZTwnHll-0414-FNL-LR.pdf>
- 355 19. Hussaini KS, Saavedra LFG. Neonatal Abstinence Syndrome (NAS) in Southwestern Border  
356 States: Examining Trends, Population Correlates, and Implications for Policy. *Matern Child*  
357 *Health J.* 2018 Sep;22(9):1352-1359. DOI: 10.1007/s10995-018-2517-y.
- 358 20. National Institute on Drug Abuse. Arizona Opioid Summary. 2018. Retrieved from  
359 [https://www.drugabuse.gov/drugs-abuse/opioids/opioid-summaries-by-state/arizona-opioid-](https://www.drugabuse.gov/drugs-abuse/opioids/opioid-summaries-by-state/arizona-opioid-summary)  
360 [summary.](https://www.drugabuse.gov/drugs-abuse/opioids/opioid-summaries-by-state/arizona-opioid-summary)
- 361 21. Arizona Department of Health Services. 2016 Arizona opioid report. Retrieved from  
362 [https://www.azdhs.gov/documents/audiences/clinicians/clinical-guidelines-](https://www.azdhs.gov/documents/audiences/clinicians/clinical-guidelines-recommendations/prescribing-guidelines/arizona-opioid-report.pdf)  
363 [recommendations/prescribing-guidelines/arizona-opioid-report.pdf.](https://www.azdhs.gov/documents/audiences/clinicians/clinical-guidelines-recommendations/prescribing-guidelines/arizona-opioid-report.pdf)
- 364 22. Patrick SW, Schumacher RE, Benneyworth BD, Krans EE, McAllister JM, Davis MM. Neonatal  
365 abstinence syndrome and associated health care expenditures: United States, 2000-2009. *JAMA.*  
366 2012 9;307(18):1934-40. DOI: 10.1001/jama.2012.3951.
- 367 23. Arizona Department of Health Services. Opioid Epidemic. 2019. Retrieved from  
368 [https://www.azdhs.gov/prevention/womens-childrens-health/injury-prevention/opioid-](https://www.azdhs.gov/prevention/womens-childrens-health/injury-prevention/opioid-prevention/index.php)  
369 [prevention/index.php.](https://www.azdhs.gov/prevention/womens-childrens-health/injury-prevention/opioid-prevention/index.php)
- 370 24. Stabler ME, Long DL, Chertok IR, Giacobbi Jr PR, Pilkerton C, Lander LR. Neonatal Abstinence  
371 Syndrome in West Virginia Substate Regions, 2007-2013. *J Rural Health.* 2017 Jan;33(1):92-101.  
372 DOI: 10.1111/jrh.12174.
- 373 25. DATA DOCUMENTATION: Sources and Field Descriptions (To accompany Primary Care Area  
374 (PCA) or Special Area Statistical Profiles) Arizona Department of Health Services: Prevention  
375 Services, May 24, 2016.

- 376 26. Ishwaran H, Kogalur UB, Gorodeski EZ, Minn AJ, Lauer MS. High-dimensional variable  
377 selection for survival data. *Journal of the American Statistical Association*. 2010 Mar  
378 1;105(489):205-17. <https://doi.org/10.1198/jasa.2009.tm08622>
- 379 27. R Core Team. R: A Language and Environment for Statistical Computing. R Foundation for  
380 Statistical Computing, Vienna, Austria, 2019.
- 381 28. Ishwaran, H, Kogalur, UB. Fast Unified Random Forests for Survival, Regression, and  
382 Classification (RF-SRC), 2020. R package version 2.9.3.
- 383 29. Chen, C, Breiman, L. Tech Report: Using random forest to learn imbalanced data. University of  
384 California, Berkeley, 2004.
- 385 30. Atwell KA, Weiss HB, Gibson C, Miller R, Corden TE. Neonatal Abstinence Syndrome and  
386 Maternal Substance Use in Wisconsin, 2009-2014. *WMJ : official publication of the State  
387 Medical Society of Wisconsin*. 2016;115(6):287-94. Epub 2017/11/03. PubMed PMID:  
388 29094858.
- 389 31. Filippelli AC, White LA, Spellman LW, Broderick M, Highfield ES, Sommers E, et al. Non-  
390 insertive Acupuncture and Neonatal Abstinence Syndrome: A Case Series From an Inner-city  
391 Safety Net Hospital. *Glob Adv Health Med*. 2012;1(4):48-52. doi: 10.7453/gahmj.2012.1.4.007.
- 392 32. Merline AC, O'Malley PM, Schulenberg JE, Bachman JG, Johnston LD. Substance use among  
393 adults 35 years of age: prevalence, adulthood predictors, and impact of adolescent substance use.  
394 *Am J Public Health*. 2004;94(1):96-102.
- 395 33. Moos RH, Nichol AC, Moos BS. Risk factors for symptom exacerbation among treated patients  
396 with substance use disorders. *Addiction*. 2002;97(1):75-85. DOI: 10.1046/j.1360-  
397 0443.2002.00063.x
- 398 34. Dobkin PL, Civita MD, Paraherakis A, Gill K. The role of functional social support in treatment  
399 retention and outcomes among outpatient adult substance abusers. *Addiction*. 2002;97(3):347-56.  
400 DOI: 10.1046/j.1360-0443.2002.00083.x
- 401 35. Beattie MC, Longabaugh R. Interpersonal factors and post-treatment drinking and subjective  
402 wellbeing. *Addiction*. 1997;92(11):1507-21.
- 403 36. Havassy BE, Wasserman DA, Hall SM. Social relationships and abstinence from cocaine in an  
404 American treatment sample. *Addiction*. 1995;90(5):699-710. DOI: 10.1046/j.1360-  
405 0443.1995.90569911.x
- 406 37. Heinz AJ, Wu J, Witkiewitz K, Epstein DH, Preston KL. Marriage and relationship closeness as  
407 predictors of cocaine and heroin use. *Addictive Behaviors*. 2009;34(3):258-63. doi:  
408 <https://doi.org/10.1016/j.addbeh.2008.10.020>.
- 409 38. Maalouf FI, Cooper WO, Stratton SM, Dudley JA, Ko J, Banerji A, Patrick SW. Positive  
410 predictive value of administrative data for neonatal abstinence syndrome. *Pediatrics*. 2019 Jan  
411 1;143(1):e20174183.
- 412 39. Jansson LM, Velez M, Harrow C. The opioid-exposed newborn: assessment and pharmacologic  
413 management. *J Opioid Manag*. 2009;5(1):47-55.

- 414 40. Kaltenbach K, Finnegan L. Neonatal abstinence syndrome. Opioid-Use Disorders in Pregnancy:  
415 Management Guidelines for Improving Outcomes. Wright, TE, Ed. Cambridge University Press.  
416 2018.
- 417 41. Farr A, Kiss H, Hagmann M, et al. Evaluation of the vaginal flora in pregnant women receiving  
418 opioid maintenance therapy: a matched case-control study. BMC Pregnancy Childbirth.  
419 2016;16(1):206. Published 2016 Aug 5. doi:10.1186/s12884-016-1003-z
- 420 42. Bagwell GA, Thomas A, Ryshen G. Improving skin integrity in babies diagnosed with neonatal  
421 abstinence syndrome. Neonatal Network, Academic of Neonatal Nursing. 2016 Sep 1;35(5):1-7.  
422 DOI: <https://doi.org/10.1891/0730-0832.35.S1.1>
- 423 43. Azuine RE, Ji Y, Chang H, et al. Prenatal Risk Factors and Perinatal and Postnatal Outcomes  
424 Associated With Maternal Opioid Exposure in an Urban, Low-Income, Multiethnic US  
425 Population. JAMA Netw Open. 2019;2(6):e196405. doi:10.1001/jamanetworkopen.2019.6405
- 426 44. Chisolm MS, Fitzsimons H, Leoutsakos JM, Acquavita SP, Heil SH, Wilson-Murphy M, Tuten  
427 M, Kaltenbach K, Martin PR, Winklbaur B, Jansson LM, Jones HE. A comparison of cigarette  
428 smoking profiles in opioid-dependent pregnant patients receiving methadone or buprenorphine.  
429 Nicotine Tob Res. 2013 Jul; 15(7):1297-304.
- 430 45. Jones HE, Heil SH, O'Grady KE, Martin PR, Kaltenbach K, Coyle MG, Stine SM, Selby P, Arria  
431 AM, Fischer G. Smoking in pregnant women screened for an opioid agonist medication study  
432 compared to related pregnant and non-pregnant patient samples. Am J Drug Alcohol Abuse.  
433 2009; 35(5):375-80.
- 434 46. Akerman SC, Brunette MF, Green AI, Goodman DJ, Blunt HB, Heil SH. Treating tobacco use  
435 disorder in pregnant women in medication-assisted treatment for an opioid use disorder: a  
436 systematic review. J Subst Abuse Treat. 2015;52:40–47. doi:10.1016/j.jsat.2014.12.002
- 437 47. Smith MV, Costello D, Yonkers KA. Clinical Correlates of Prescription Opioid Analgesic Use in  
438 Pregnancy. Matern Child Health J 2015; 19:548–556. DOI: <https://doi.org/10.1007/s10995-014-1536-6>
- 440 48. Prabhu M, Garry EM, Hernandez-Diaz S, MacDonald SC, Huybrechts KF, Bateman BT.  
441 Frequency of opioid dispensing after vaginal delivery. Obstetrics and gynecology. 2018  
442 Aug;132(2):459-65. DOI:10.1097/AOG.0000000000002741
- 443 49. Robinson JN, Norwitz ER, Cohen AP, McElrath TF, Lieberman ES. Epidural analgesia and third-  
444 or fourth-degree lacerations in nulliparas. Obstetrics & Gynecology. 1999 Aug 1;94(2):259-62.
- 445 50. Hoyt MR, Shah U, Cooley J, Temple M. Use of epidural clonidine for the management of  
446 analgesia in the opioid addicted parturient on buprenorphine maintenance therapy: an  
447 observational study. International journal of obstetric anesthesia. 2018 May 1;34:67-72.
- 448 51. Cassidy B, Cyna AM. Challenges that opioid-dependent women present to the obstetric  
449 anaesthetist. Anaesthesia and intensive care. 2004 Aug;32(4):494-501.
- 450 52. Segal, D, City of Addict Entrepreneurs. December, 2017. The New York Times.  
451 [https://kjzz.org/content/287185/prescott-grappling-costs-becoming-national-destination-  
452 addiction-recovery;](https://kjzz.org/content/287185/prescott-grappling-costs-becoming-national-destination-addiction-recovery)

- 453 53. Stone, W. “Prescott Grappling With Costs Of Becoming National Destination For Addiction  
454 Recovery” KJZZ, Rio Salado College Public Radio. April, 2016.  
455 <https://www.nytimes.com/interactive/2017/12/27/business/new-drug-rehabs.html>
- 456 54. Cleveland, C. Pregnant and Addicted: Opioid deaths in Arizona nearly doubled over the past ten  
457 years. The number of babies born exposed to opioids grew more than twice as fast. Arizona  
458 Center for Investigative Reporting. January, 2018. [https://azcir.org/news/2018/01/26/arizona-  
459 opioid-epidemic-grew-twice-as-fast-for-pregnant-mothers-newborns-babies/](https://azcir.org/news/2018/01/26/arizona-opioid-epidemic-grew-twice-as-fast-for-pregnant-mothers-newborns-babies/)
